# Supplementary material for: Modelling and Optimal Control of Typhoid Fever Disease with Cost-Effective Strategies
Source: Hindawi journal article supplement (doi:10.1155/2017/2324518), 2017-01-01

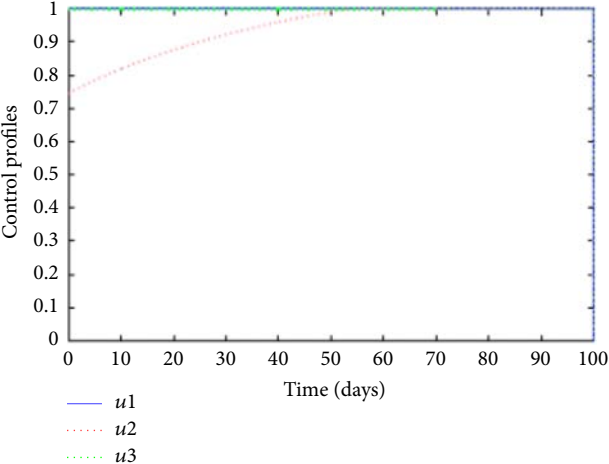

Supplement: f1 [file 2324518.f1.pdf]
